# Supplementary material
Source: PubMed Central journal article supplement (PMC2974606)
Supplement: blood-2010-02-269894_1.pdf [file blood-2010-02-269894_1.pdf]

**Table S1. Clinical characteristics of the CLL patients used in this study**

| Characteristic | No. of Patients (total: 38) | %  |
|----------------|-----------------------------|----|
| Age, years     |                             |    |
| median         | 60                          |    |
| range          | 42-78                       |    |
| male           | 29                          | 76 |
| Rai stage      |                             |    |
| 0              | 8                           | 21 |
| 1              | 7                           | 18 |
| 2              | 5                           | 13 |
| 3              | 7                           | 18 |
| 4              | 11                          | 29 |
| Therapy        |                             |    |
| treated        | 11                          | 29 |
| untreated      | 27                          | 71 |
| ZAP-70         |                             |    |
| <20%           | 22                          | 58 |
| ≥20%           | 14                          | 37 |
| IGHV unmutated | 16                          | 42 |
| CD38           |                             |    |
| <30%           | 29                          | 76 |
| ≥30%           | 9                           | 24 |
| FISH           |                             |    |
| Del13q14.2     | 19                          | 50 |
| normal         | 4                           | 11 |
| Trisomy 12     | 6                           | 16 |
| Del 11q22.3    | 4                           | 11 |
| Del 17p13.1    | 2                           | 5  |

**Table S2. Fluorescent reading of migration experiments**

|    | AIM-V | CLL CM | (+) ctrl | (-) ctrl | AIM-V/<br>(+) ctrl | CLL CM/<br>(+) ctrl |
|----|-------|--------|----------|----------|--------------------|---------------------|
| 1  | 1928  | 2152   | 3459     | 870      | 55.73865           | 62.21451            |
| 2  | 1340  | 1475   | 1946     | 875      | 68.8592            | 75.79651            |
| 3  | 1679  | 1856   | 2957     | 880      | 56.78052           | 62.76632            |
| 4  | 1614  | 1924   | 3141     | 878      | 51.38491           | 61.25438            |
| 5  | 1837  | 1977   | 2576     | 736      | 71.31211           | 76.74689            |
| 6  | 1896  | 2245   | 2814     | 716      | 67.3774            | 79.77967            |
| 7  | 2161  | 2264   | 3578     | 726      | 60.39687           | 63.27557            |
| 8  | 1655  | 1759   | 2734     | 696      | 60.53402           | 64.33797            |
| 9  | 2038  | 2149   | 2945     | 750      | 69.20204           | 72.97114            |
| 10 | 2492  | 2858   | 4208     | 897      | 59.2135            | 67.92206            |
| 11 | 2330  | 2690   | 4111     | 839      | 56.67031           | 65.4384             |
| 12 | 2339  | 2666   | 3748     | 907      | 62.41996           | 71.13127            |
| 13 | 2201  | 3281   | 4451     | 843      | 49.45524           | 73.70549            |
| 14 | 2268  | 2912   | 3878     | 949      | 58.47622           | 75.09346            |
| 15 | 1713  | 1983   | 2430     | 950      | 70.4999            | 81.60872            |
| 16 | 3083  | 4115   | 4332     | 1166     | 71.17959           | 94.99077            |

The fluorescent reading of the migration experiments were shown in this table. Calcein labeled MSC was tested the capability to migrate to either AIM-V, CLL CM or  $\alpha$ MEM containing 10% FBS. (+) ctrl: same number of MSC was seeded in a separate well to be used as positive control. (-) ctrl: aim-v medium alone without cells was used as negative control. In some experiments, MSC cells were tested for their migration capacity to  $\alpha$ MEM containing 10% FBS as additional positive control.

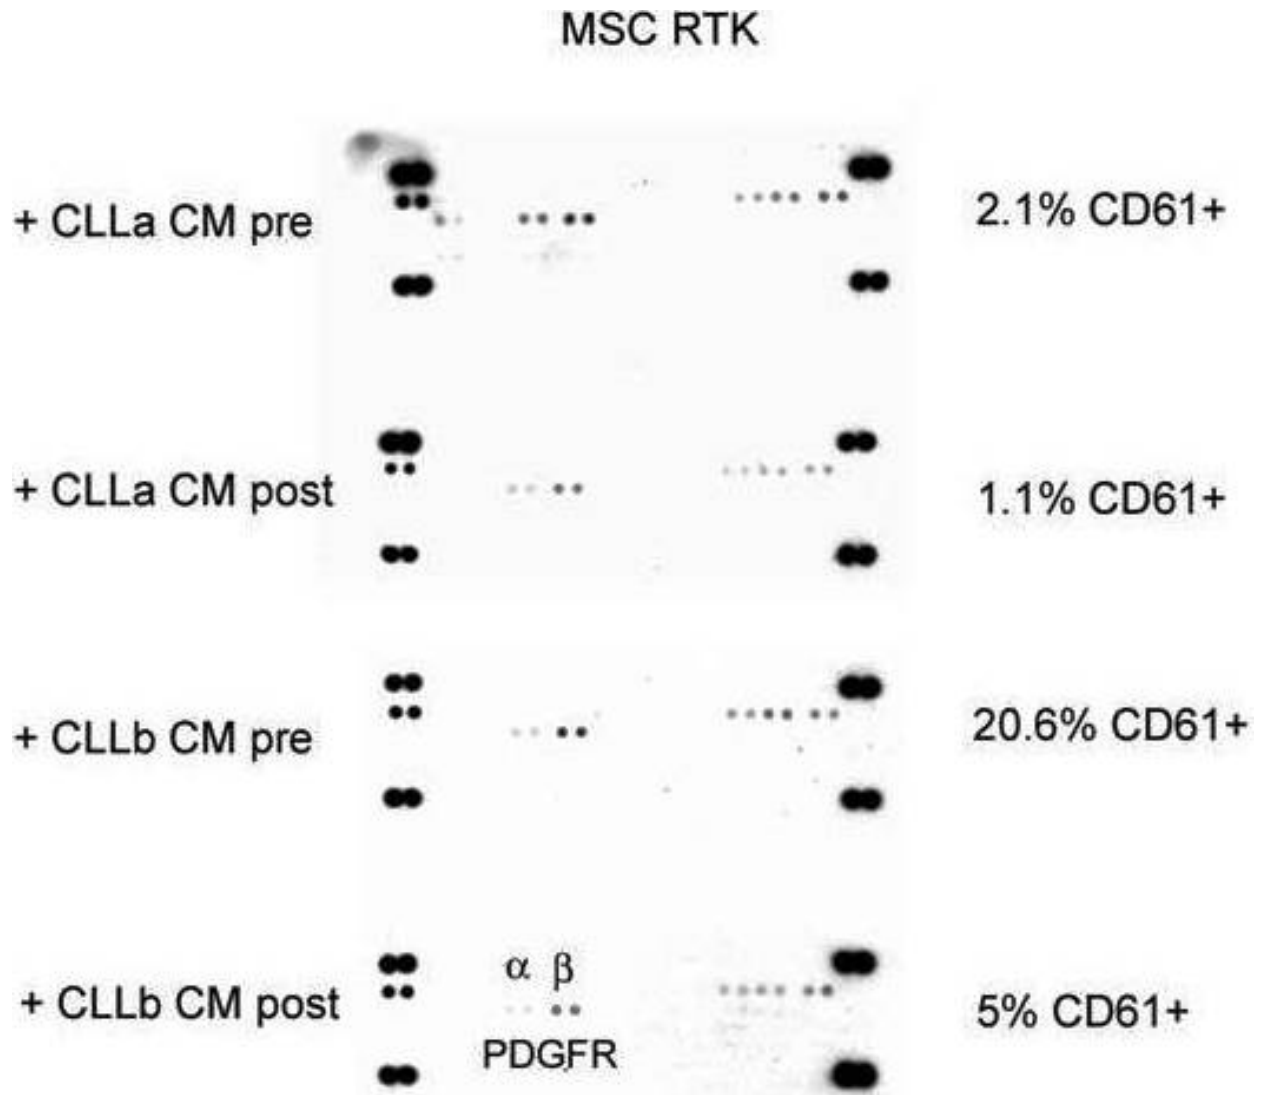

**Figure S1. CLL MSC demonstrated selective PDGFR activation when they were exposed to the CLL CM with (CM post) or without platelet depletion (CM pre)**  
 CLL CM were generated from two different CLL PBMCs with or without platelet depletion. The CD61 percentage was shown at the right side of the figure in each condition. The intensity of PDGFR activation does not appear to directly correlate with the percentage of CD61 expression in the CLL CM.

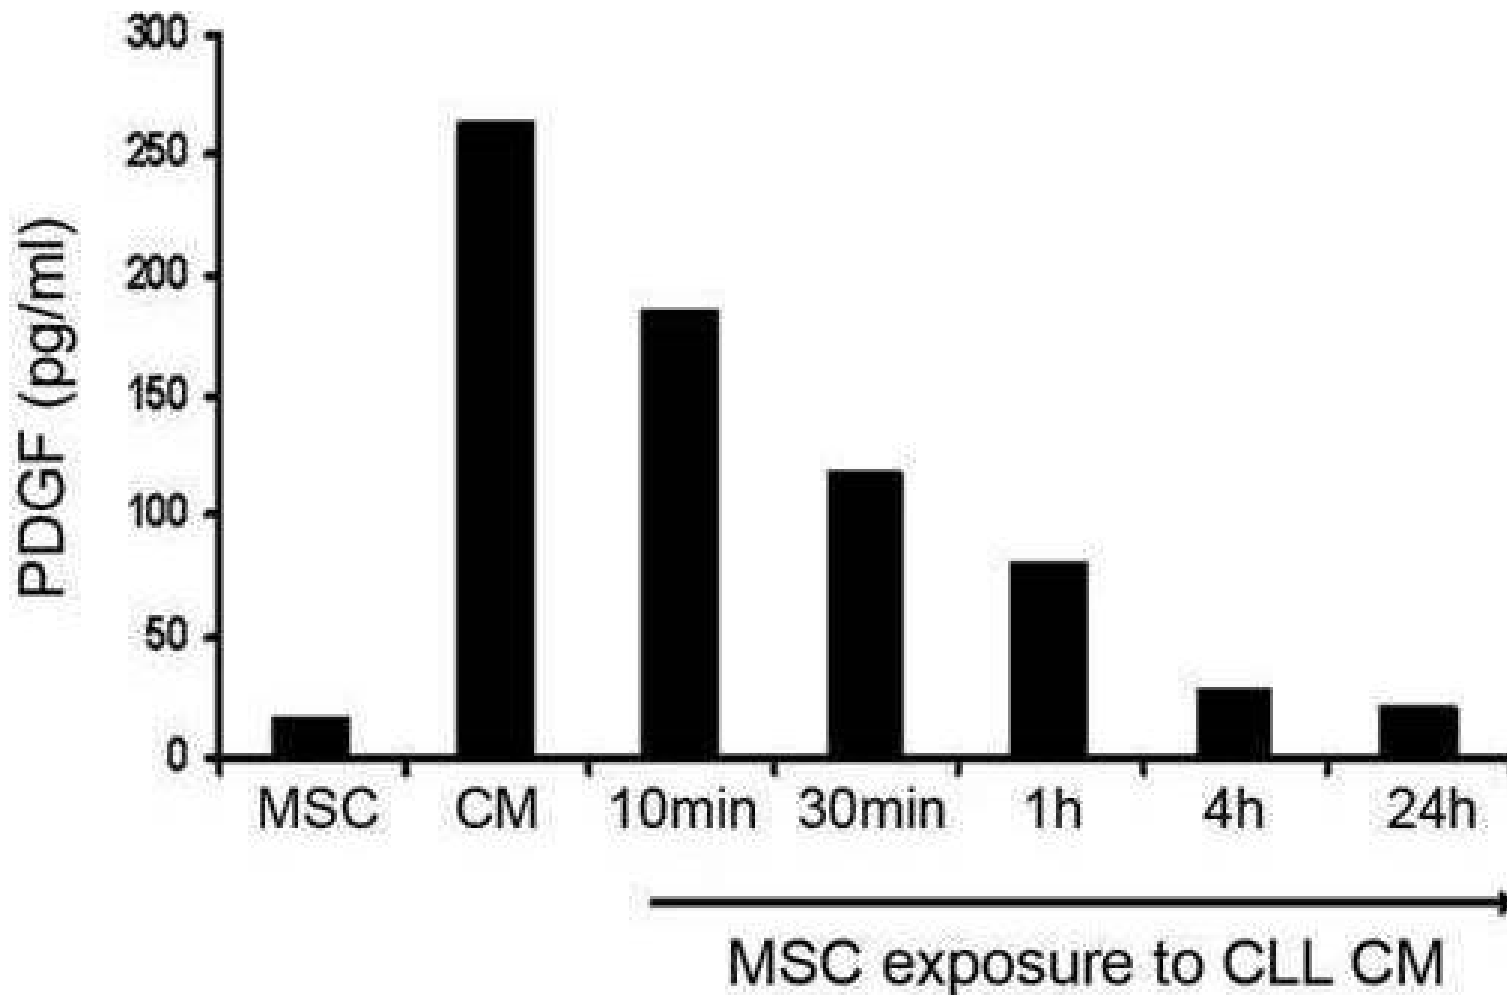

**Figure S2. CLL MSC in culture alone produces minimal amount of PDGF and utilizes PDGF produced in CLL-CM in a time dependent manner**

CLL-CM was added to the same MSC for 24 h. The culture supernatant was collected at different time points as indicated during the culture. PDGF level was tested by ELISA methods using the collected culture supernatant. The bar graph shown is one example of two individual experiments.
